# Supplementary material for: Experiment-in-loop interactive optimization of polymer composites for “5G-and-beyond” communication technologies
Source: Royal Society of Chemistry journal article supplement (doi:10.1039/d4mh01606h), 2025-01-01
Supplement: d4mh01606h1.pdf [file d4mh01606h1.pdf]

## Experiment-in-Loop Interactive Optimization of Polymer Composites for "5G-and-Beyond"

Bin Xu<sup>1,2,#</sup>, Touchy Abeda Sultana<sup>2,#</sup>, Koki Kitai<sup>2</sup>, Jiang Guo<sup>3</sup>, Toyomitsu Seki<sup>4</sup>, Ryo Tamura<sup>5</sup>, Koji Tsuda<sup>3</sup>, Junichiro Shiomi<sup>1,2\*</sup>

<sup>1</sup>Department of Mechanical Engineering, The University of Tokyo, 7-3-1 Hongo, Bunkyo, Tokyo, 113-8656, Japan

<sup>2</sup>Institute of Engineering Innovation, The University of Tokyo, 2-11 Yayoi, Bunkyo, Tokyo 113-8656, Japan

<sup>3</sup>Department of Computational Biology and Medical Sciences, The University of Tokyo, 5-1-5 Kashiwa-no-ha, Kashiwa-shi, Chiba-ken, 277-8561, Japan

<sup>4</sup>Technology and Innovation Center, Daikin Industries, Ltd, 1-1, Nishihitotsuya, Settu, Osaka, 566-8585, Japan

<sup>5</sup>Center for Basic Research on Materials, National Institute for Materials Science, 305-0044 1-1 Namiki Tsukuba Ibaraki, 305-0047, Japan

\*Lead contact: [shiomi@photon.t.u-tokyo.ac.jp](mailto:shiomi@photon.t.u-tokyo.ac.jp) (J.Shiomi)

#These authors contributed equally (B. Xu and T. A. Sultana).

## SI Tables

**Table S1 Detailed information of the filler used in the experiment.**

| Filler producer | Filler name | Filler structure                                         | Surface chemistry                     |
|-----------------|-------------|----------------------------------------------------------|---------------------------------------|
| ACG             | Sunlovely   | Length: 4—6 $\mu$ m (thickness<0.1 $\mu$ m) plate filler | -/Perfluorohexylethyl Triethoxysilane |
| Kowa            | KSF-3N      | diameter: 7.5 $\mu$ m, filament filler                   | -/Triethoxy(pentafluorophenyl)silane  |
| Kowa            | TKV         | diameter: 0.7~2.1 $\mu$ m, filament filler               | -/Triethoxy(pentafluorophenyl)silane  |
| Nipponsteel     | HS-208      | diameter: 20 $\mu$ m, Spherical filler                   | -/Triethoxy(pentafluorophenyl)silane  |
| Nipponsteel     | HS-311      | diameter: 2.2 $\mu$ m, Spherical filler                  | -/Triethoxy(pentafluorophenyl)silane  |

**Table S2 Dataset collected in BO process.**

| Sample No. | Sample properties |            |               |                        |        | Fabrication parameters |                |                        |                            |                           |                            |                                |                               |
|------------|-------------------|------------|---------------|------------------------|--------|------------------------|----------------|------------------------|----------------------------|---------------------------|----------------------------|--------------------------------|-------------------------------|
|            | CTE (ppm/K)       | $\epsilon$ | $\tan \sigma$ | Extinction coefficient | FOM    | Time (min)             | Rotation (rpm) | Plate filler condition | Spherical filler condition | Filament filler condition | Weight of plate filler (g) | Weight of spherical filler (g) | Weight of filament filler (g) |
| 0          | 98.9              | 2.44       | 3.E-03        | 4.E-03                 | -0.110 | 7                      | 100            | 1                      | 3                          | 2                         | 2                          | 3                              | 2                             |
| 0          | 67.0              | 2.62       | 3.E-03        | 5.E-03                 | 0.000  | 9                      | 200            | 1                      | 0                          | 3                         | 2                          | 2                              | 3                             |
| 0          | 76.7              | 2.42       | 3.E-03        | 5.E-03                 | -0.010 | 7                      | 150            | 1                      | 0                          | 0                         | 2                          | 0                              | 2                             |
| 0          | 121.3             | 2.26       | 6.E-03        | 8.E-03                 | -0.803 | 5                      | 50             | 1                      | 0                          | 3                         | 5                          | 0                              | 1                             |
| 0          | 52.2              | 2.55       | 3.E-03        | 5.E-03                 | 0.102  | 5                      | 250            | 1                      | 0                          | 2                         | 2                          | 0                              | 5                             |
| 0          | 73.0              | 2.52       | 1.E-03        | 2.E-03                 | 0.323  | 7                      | 250            | 0                      | 1                          | 1                         | 1                          | 4                              | 2                             |
| 1          | 38.8              | 2.44       | 6.E-04        | 9.E-04                 | 0.691  | 5                      | 250            | 0                      | 1                          | 0                         | 0                          | 2                              | 4                             |
| 1          | 95.7              | 2.42       | 1.E-03        | 2.E-03                 | 0.181  | 5                      | 250            | 0                      | 0                          | 0                         | 1                          | 6                              | 0                             |
| 1          | 66.4              | 2.37       | 7.E-04        | 1.E-03                 | 0.492  | 9                      | 250            | 0                      | 3                          | 0                         | 0                          | 1                              | 5                             |
| 1          | 112.5             | 2.32       | 8.E-04        | 1.E-03                 | 0.160  | 5                      | 250            | 0                      | 0                          | 3                         | 0                          | 2                              | 1                             |
| 1          | 122.3             | 2.25       | 6.E-04        | 9.E-04                 | 0.141  | 5                      | 250            | 0                      | 3                          | 0                         | 0                          | 7                              | 0                             |
| 2          | 35.9              | 2.41       | 6.E-04        | 1.E-03                 | 0.706  | 5                      | 250            | 0                      | 0                          | 0                         | 0                          | 0                              | 7                             |
| 2          | 67.4              | 2.39       | 6.E-04        | 1.E-03                 | 0.495  | 5                      | 50             | 1                      | 3                          | 0                         | 0                          | 2                              | 5                             |
| 2          | 61.9              | 2.50       | 6.E-04        | 1.E-03                 | 0.533  | 5                      | 250            | 0                      | 0                          | 0                         | 0                          | 2                              | 5                             |
| 2          | 49.9              | 2.43       | 8.E-04        | 1.E-03                 | 0.572  | 5                      | 250            | 0                      | 3                          | 0                         | 0                          | 1                              | 6                             |
| 2          | 32.7              | 2.44       | 7.E-04        | 1.E-03                 | 0.716  | 5                      | 50             | 0                      | 2                          | 0                         | 0                          | 2                              | 5                             |
| 3          | 40.2              | 2.52       | 7.E-04        | 1.E-03                 | 0.653  | 5                      | 100            | 0                      | 1                          | 0                         | 0                          | 1                              | 6                             |
| 3          | 32.9              | 2.43       | 6.E-04        | 9.E-04                 | 0.738  | 9                      | 50             | 0                      | 0                          | 0                         | 0                          | 0                              | 7                             |
| 3          | 31.8              | 2.53       | 9.E-04        | 1.E-03                 | 0.683  | 5                      | 50             | 0                      | 1                          | 0                         | 0                          | 1                              | 6                             |
| 3          | 28.3              | 2.38       | 9.E-04        | 1.E-03                 | 0.704  | 5                      | 50             | 0                      | 0                          | 0                         | 0                          | 0                              | 7                             |
| 3          | 47.9              | 2.49       | 6.E-04        | 9.E-04                 | 0.628  | 7                      | 150            | 0                      | 1                          | 0                         | 0                          | 1                              | 6                             |
| 4          | 24.8              | 2.56       | 6.E-04        | 1.E-03                 | 0.782  | 7                      | 50             | 0                      | 0                          | 0                         | 0                          | 0                              | 7                             |
| 4          | 40.2              | 2.49       | 7.E-04        | 1.E-03                 | 0.652  | 7                      | 100            | 0                      | 0                          | 0                         | 0                          | 0                              | 7                             |
| 4          | 28.8              | 2.52       | 2.E-03        | 2.E-03                 | 0.577  | 9                      | 100            | 0                      | 0                          | 0                         | 0                          | 0                              | 7                             |
| 4          | 28.5              | 2.49       | 6.E-04        | 1.E-03                 | 0.750  | 5                      | 100            | 0                      | 0                          | 0                         | 0                          | 0                              | 7                             |
| 4          | 43.6              | 2.01       | 2.E-03        | 3.E-03                 | 0.389  | 9                      | 50             | 0                      | 0                          | 3                         | 0                          | 0                              | 7                             |
| 5          | 94.7              | 2.18       | 6.E-04        | 9.E-04                 | 0.327  | 5                      | 50             | 0                      | 0                          | 0                         | 0                          | 0                              | 3                             |
| 5          | 44.4              | 2.33       | 7.E-04        | 1.E-03                 | 0.633  | 5                      | 50             | 0                      | 0                          | 0                         | 0                          | 0                              | 6                             |
| 5          | 109.9             | 2.14       | 6.E-04        | 9.E-04                 | 0.223  | 7                      | 50             | 0                      | 0                          | 0                         | 0                          | 0                              | 3                             |
| 5          | 57.8              | 2.46       | 6.E-04        | 1.E-03                 | 0.557  | 5                      | 50             | 0                      | 0                          | 0                         | 1                          | 0                              | 6                             |
| 5          | 82.7              | 2.22       | 6.E-04        | 8.E-04                 | 0.410  | 5                      | 50             | 0                      | 0                          | 0                         | 0                          | 0                              | 4                             |
| 6          | 25.4              | 2.58       | 8.E-04        | 1.E-03                 | 0.746  | 5                      | 50             | 0                      | 0                          | 0                         | 0                          | 1                              | 6                             |
| 6          | 120.3             | 2.24       | 4.E-04        | 7.E-04                 | 0.180  | 9                      | 50             | 0                      | 0                          | 0                         | 0                          | 7                              | 0                             |

|    |       |      |        |        |        |   |     |   |   |   |   |   |   |
|----|-------|------|--------|--------|--------|---|-----|---|---|---|---|---|---|
| 6  | 42.1  | 2.38 | 8.E-04 | 1.E-03 | 0.632  | 9 | 50  | 0 | 0 | 0 | 0 | 3 | 4 |
| 6  | 75.5  | 2.18 | 7.E-04 | 1.E-03 | 0.426  | 9 | 50  | 0 | 0 | 0 | 0 | 2 | 5 |
| 6  | 74.0  | 2.50 | 3.E-03 | 4.E-03 | 0.047  | 9 | 250 | 0 | 3 | 0 | 6 | 1 | 0 |
| 7  | 45.2  | 2.38 | 6.E-04 | 9.E-04 | 0.648  | 5 | 150 | 0 | 0 | 0 | 0 | 0 | 7 |
| 7  | 58.1  | 2.58 | 6.E-04 | 1.E-03 | 0.559  | 5 | 50  | 0 | 0 | 0 | 0 | 4 | 3 |
| 7  | 38.8  | 2.66 | 7.E-04 | 1.E-03 | 0.658  | 5 | 50  | 0 | 0 | 0 | 0 | 3 | 4 |
| 7  | 40.5  | 2.56 | 7.E-04 | 1.E-03 | 0.649  | 5 | 50  | 0 | 1 | 0 | 0 | 4 | 3 |
| 7  | 93.1  | 2.27 | 7.E-04 | 1.E-03 | 0.310  | 5 | 250 | 0 | 3 | 0 | 0 | 1 | 2 |
| 8  | 49.8  | 2.48 | 7.E-04 | 1.E-03 | 0.603  | 5 | 250 | 0 | 1 | 0 | 0 | 1 | 6 |
| 8  | 61.8  | 2.41 | 9.E-04 | 1.E-03 | 0.482  | 5 | 250 | 0 | 2 | 0 | 0 | 1 | 6 |
| 8  | 57.9  | 2.53 | 8.E-04 | 1.E-03 | 0.527  | 7 | 250 | 0 | 1 | 0 | 0 | 1 | 6 |
| 8  | 51.7  | 2.34 | 9.E-04 | 1.E-03 | 0.548  | 5 | 250 | 0 | 2 | 0 | 0 | 1 | 6 |
| 8  | 58.4  | 2.67 | 2.E-03 | 3.E-03 | 0.258  | 9 | 50  | 0 | 3 | 3 | 0 | 1 | 6 |
| 9  | 71.4  | 2.61 | 2.E-03 | 3.E-03 | 0.165  | 5 | 150 | 0 | 3 | 3 | 0 | 1 | 6 |
| 9  | 83.9  | 2.56 | 2.E-03 | 4.E-03 | 0.036  | 9 | 250 | 0 | 3 | 3 | 0 | 3 | 4 |
| 9  | 94.4  | 2.56 | 2.E-03 | 3.E-03 | 0.102  | 5 | 250 | 0 | 3 | 3 | 0 | 3 | 4 |
| 9  | 82.0  | 2.59 | 2.E-03 | 3.E-03 | 0.124  | 5 | 250 | 0 | 0 | 3 | 0 | 0 | 7 |
| 9  | 69.7  | 2.61 | 3.E-03 | 4.E-03 | 0.082  | 9 | 250 | 1 | 3 | 3 | 1 | 1 | 5 |
| 10 | 24.9  | 2.65 | 1.E-03 | 2.E-03 | 0.669  | 5 | 50  | 0 | 0 | 1 | 0 | 0 | 7 |
| 10 | 86.9  | 2.22 | 1.E-03 | 2.E-03 | 0.275  | 5 | 250 | 0 | 0 | 0 | 0 | 0 | 3 |
| 10 | 36.3  | 2.59 | 1.E-03 | 2.E-03 | 0.597  | 7 | 50  | 0 | 0 | 1 | 0 | 0 | 7 |
| 10 | 56.6  | 2.45 | 1.E-03 | 2.E-03 | 0.403  | 5 | 150 | 1 | 3 | 0 | 1 | 1 | 5 |
| 10 | 35.5  | 2.58 | 2.E-03 | 2.E-03 | 0.527  | 5 | 50  | 1 | 0 | 0 | 1 | 0 | 6 |
| 11 | 113.2 | 2.28 | 7.E-04 | 1.E-03 | 0.172  | 9 | 50  | 0 | 0 | 3 | 0 | 6 | 1 |
| 11 | 77.7  | 2.57 | 3.E-03 | 5.E-03 | -0.040 | 5 | 250 | 1 | 1 | 0 | 1 | 3 | 3 |
| 11 | 72.7  | 2.51 | 1.E-03 | 2.E-03 | 0.323  | 5 | 50  | 0 | 0 | 3 | 0 | 4 | 3 |
| 11 | 72.4  | 2.50 | 1.E-03 | 2.E-03 | 0.330  | 5 | 50  | 0 | 0 | 2 | 0 | 3 | 4 |
| 11 | 81.8  | 2.50 | 3.E-03 | 4.E-03 | 0.018  | 9 | 250 | 1 | 2 | 0 | 1 | 4 | 2 |

**Table S3 CTE and dielectric performance compared with previous studies.**

| Ref.                          | Component              | Filler dimensions                                                          | Filler diameter/shape                                                | Filler (wt%) | CTE (ppm/K) | $\epsilon$ | $\tan\delta$          | Extinction coefficient | FOM    |
|-------------------------------|------------------------|----------------------------------------------------------------------------|----------------------------------------------------------------------|--------------|-------------|------------|-----------------------|------------------------|--------|
| This study                    | SiO <sub>2</sub> /PTFE | 0.7-2.1 nm/<br>filament                                                    | pristine                                                             | 0.46         | 24.76       | 2.56       | $6.00 \times 10^{-4}$ | $9.50 \times 10^{-4}$  | 0.782  |
| Alhaji et al. <sup>10</sup>   | SiO <sub>2</sub> /PTFE | 25 $\mu\text{m}$ /<br>spherical                                            | pristine                                                             | -            | 55.77       | 2.18       | $1.10 \times 10^{-2}$ | $1.62 \times 10^{-2}$  | -1.336 |
|                               | SiO <sub>2</sub> /PTFE | 106 $\mu\text{m}$ /<br>spherical                                           | pristine                                                             | -            | 64.86       | 2.07       | $1.00 \times 10^{-3}$ | $1.44 \times 10^{-3}$  | 0.453  |
| Liu et al. <sup>3</sup>       | SiO <sub>2</sub> /PTFE | $\leq 10 \mu\text{m}$ /<br>spherical                                       | Methyltriethoxysilane                                                | 0.40         | 141.00      | 2.30       | $1.10 \times 10^{-3}$ | $1.67 \times 10^{-3}$  | -0.085 |
| Li et al. <sup>39</sup>       | SiO <sub>2</sub> /PTFE | 20 $\mu\text{m}$ /<br>spherical (hollow)                                   | pristine                                                             | 0.40         | 95.00       | 1.94       | $8.40 \times 10^{-4}$ | $1.17 \times 10^{-3}$  | 0.285  |
| Jin et al. <sup>7</sup>       | SiO <sub>2</sub> /PTFE | -/<br>spherical                                                            | $\gamma$ -methacryloxypropyltrimethoxysilane +<br>pentafluorostyrene | 0.30         | 86.00       | 2.38       | $1.00 \times 10^{-3}$ | $1.54 \times 10^{-3}$  | 0.299  |
| Chen et al. <sup>40</sup>     | SiO <sub>2</sub> /PTFE | 25 $\mu\text{m}$ /<br>spherical                                            | Phenyltrimethoxy silane                                              | 0.60         | 33.20       | 2.97       | $2.50 \times 10^{-3}$ | $4.31 \times 10^{-3}$  | 0.306  |
| Chen et al. <sup>11</sup>     | SiO <sub>2</sub> /PTFE | 5 $\mu\text{m}$ /<br>spherical                                             | Phenyltrimethoxy silane                                              | 0.60         | 40.00       | 2.80       | $1.50 \times 10^{-3}$ | $2.51 \times 10^{-3}$  | 0.486  |
| Yuan et al. <sup>8</sup>      | SiO <sub>2</sub> /PTFE | 9 $\mu\text{m}$ /<br>spherical                                             | Phenyltrimethoxy silane                                              | 0.57         | 32.30       | 2.89       | $7.00 \times 10^{-4}$ | $1.19 \times 10^{-3}$  | 0.702  |
| Jiang. et al. <sup>7</sup>    | SiO <sub>2</sub> /PTFE | 2 $\mu\text{m}$ + 15 $\mu\text{m}$ /<br>spherical (mixed)                  | Phenyltrimethoxysilane/Aminopropyltriethoxysilane                    | 0.62         | 18.60       | 2.99       | $2.00 \times 10^{-3}$ | $3.46 \times 10^{-3}$  | 0.510  |
| Zheng et al. <sup>5</sup>     | CLST/PTFE              | -                                                                          | -                                                                    | 0.40         | 45.00       | 7.92       | $1.20 \times 10^{-3}$ | $3.38 \times 10^{-3}$  | 0.344  |
| Subodh et al. <sup>4</sup>    | PTFE/TeO <sub>2</sub>  | -                                                                          | tetrabutyltitanate                                                   | 0.60         | 32.00       | 5.40       | $6.00 \times 10^{-3}$ | $1.39 \times 10^{-2}$  | -0.890 |
| Wang et al. <sup>6</sup>      | PTFE/BCZN              | 0.456 $\mu\text{m}$<br>/near-spherical                                     | Perfluorooctyltriethoxysilane                                        | 0.50         | 33.00       | 7.70       | $1.40 \times 10^{-3}$ | $3.88 \times 10^{-3}$  | 0.361  |
| Huang et al. <sup>31</sup>    | epoxy resin<br>/BNNT   | 50 nm<br>/nanotube                                                         | oligosilsesquioxane                                                  | 0.30         | 53.00       | 3.50       | $2.50 \times 10^{-2}$ | $4.68 \times 10^{-2}$  | -5.134 |
| Sasikala et al. <sup>29</sup> | PS/SiO <sub>2</sub>    | 0.4 $\mu\text{m}$<br>/spherical                                            | 3-<br>Aminopropyltriethoxysilane/vinyltriethoxysilane                | 0.11         | 50.00       | 3.15       | $1.60 \times 10^{-2}$ | $2.84 \times 10^{-2}$  | -2.817 |
| Xue et al. <sup>30</sup>      | SiO <sub>2</sub> -PEEK | 7 $\mu\text{m}$ +10 $\mu\text{m}$ +20 $\mu\text{m}$ /<br>Spherical (mixed) | 3-Aminopropyltriethoxysilane                                         | 0.60         | 23.60       | 3.35       | $1.63 \times 10^{-3}$ | $2.98 \times 10^{-3}$  | 0.536  |

**Table S4 Structural character of Sample #A~#E.**

| Sample No. | Density (g/cm <sup>3</sup> ) | Intensity @788cm <sup>-1</sup> | Intensity @2367cm <sup>-1</sup> | Amorphous index (from FTIR) | Amorphous degree (from XRD) |
|------------|------------------------------|--------------------------------|---------------------------------|-----------------------------|-----------------------------|
| #A         | 2.15                         | $8.60 \times 10^{-2}$          | $3.15 \times 10^{-3}$           | 27.30                       | 0.581                       |
| #B         | 2.15                         | $5.90 \times 10^{-2}$          | $1.04 \times 10^{-2}$           | 5.65                        | 0.616                       |
| #C         | 2.13                         | $1.19 \times 10^{-1}$          | $9.90 \times 10^{-2}$           | 12.02                       | 0.630                       |
| #D         | 2.06                         | $1.62 \times 10^{-1}$          | $1.26 \times 10^{-2}$           | 12.90                       | 0.655                       |
| #E         | 2.08                         | $1.47 \times 10^{-1}$          | $1.30 \times 10^{-2}$           | 11.27                       | 0.657                       |

**Table S5 Parameters for EMT calculations**

| $G_p$<br>(GPa) | $G_v$<br>(GPa) | $G_f$<br>(MPa) | $k_p$<br>(GPa) | $k_v$<br>(GPa) | $k_f$<br>(GPa) | $a_p$<br>(ppm/K) | $a_f$<br>(ppm/K) | $v_f$ |
|----------------|----------------|----------------|----------------|----------------|----------------|------------------|------------------|-------|
| 0.24           | 0              | 0.42           | 1.36           | 0              | 36.3           | 159              | 0.5              | 0.46  |

## SI Figures

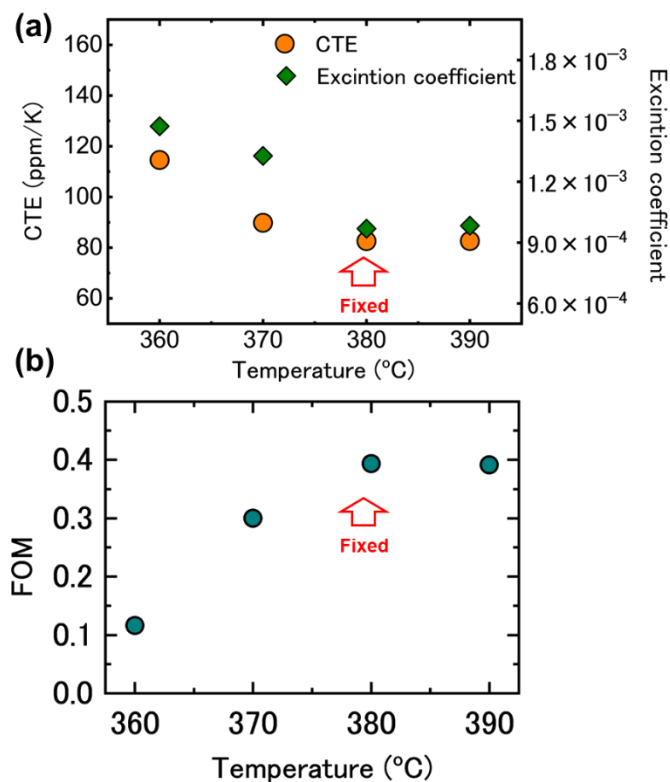

**Figure S1. The performance of the silica/PFA under different compounding temperature.** (a) the CTE and the dielectric extinction coefficient, (b) the FOM of PFA/silica composite compounded under different temperature. The composites consist of the filament filler of 3.5 g, and PFA of 11.5 g; the rotation speed is 50 rpm. (When compounding temperature exceed 370 °C, the FOM achieve a acceptable value and saturate.

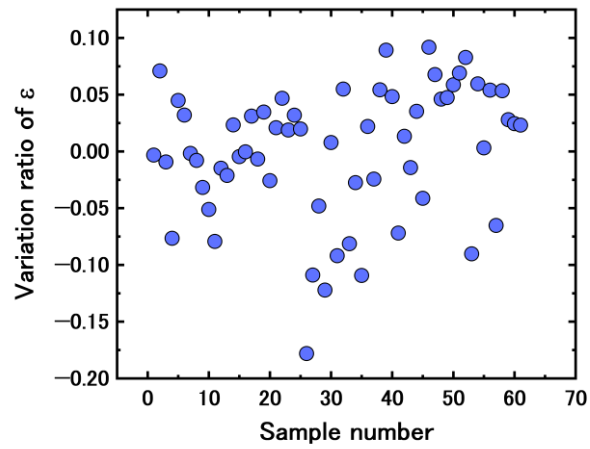

**Figure S2.** The variation ratio of  $\varepsilon$  during the BO process.

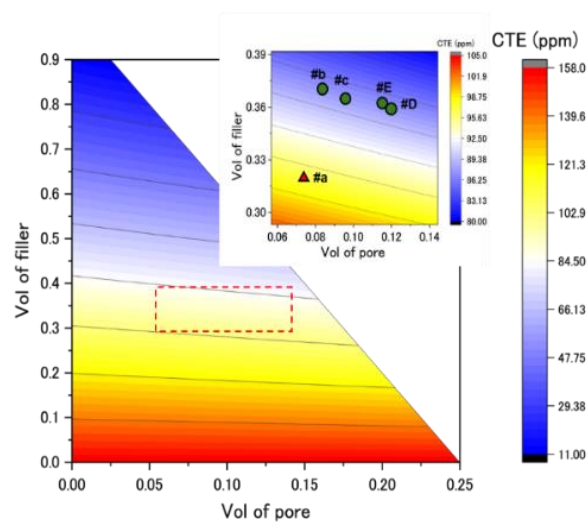

**Figure S3.** EMT calculation for the CTE of composite. Theoretical CTE values of a three-phase composite consist of PFA, silica, and pore, calculated by EMT with the parameters obtained for samples #A~#E.

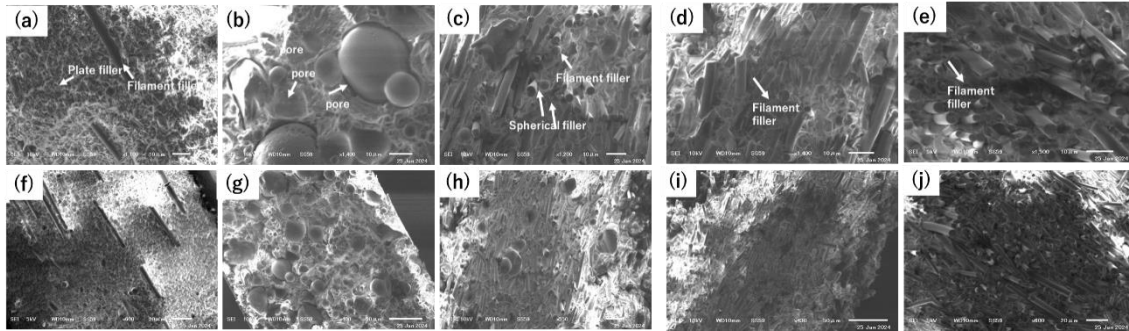

**Figure S4. SEM image of PFA/silica composite.** Cross-section SEM image of the Sample (a)(f) #A, (b)(g) #B, (c)(h) #C, (d)(i) #D, (e)(j) #E under (a)-(e) low and (f)-(j) high magnification.

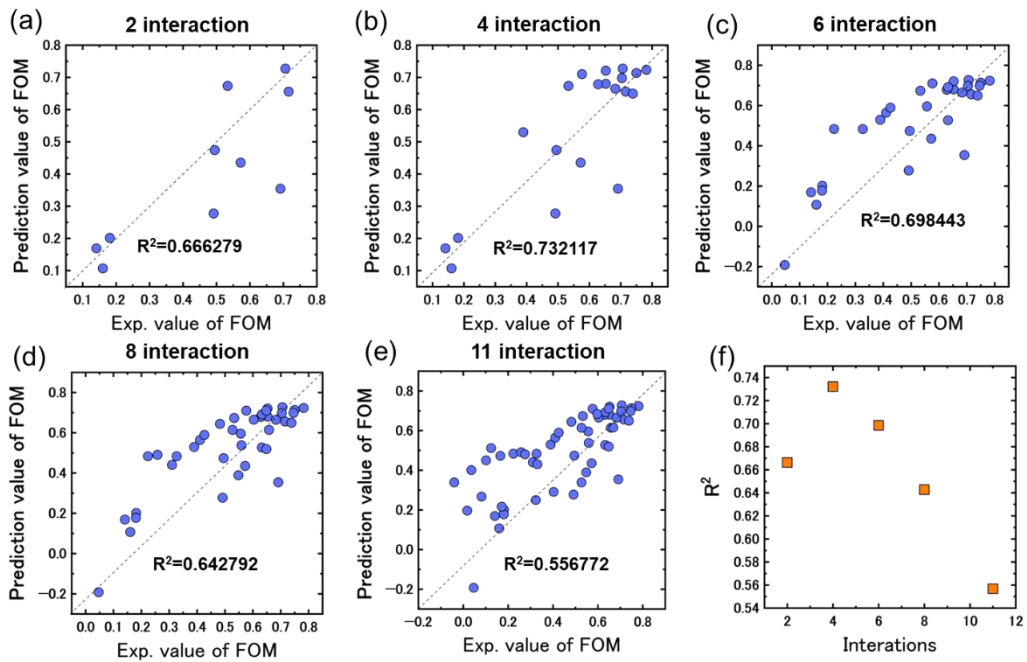

**Figure S5. Parity plots of BO.** (a)-(e) Parity plots of FOM during the BO under an interaction number of 2, 4, 6, 8, 11, respectively; (f) Variation of R<sup>2</sup> under different interactions.
